# Supplementary material for: Suitable Interpretation of Skin Prick Test and Biomedical Guidance Leads to a Better Clinical State in Atopic Individuals with High Indoor Permanence: Possible Therapeutic Implications
Source: MDPI journal article supplement (doi:10.3390/biologics1020014), 2021-09-03
Supplement: s1 [file s1]

## Supplementary Material

# Suitable Interpretation of Skin Prick Test and Biomedical Guidance Leads to a Better Clinical State in Atopic Individuals with High Indoor Permanence: Possible Therapeutic Implications

Bernardo Yassunobu Nakamatsu <sup>1,†</sup>, Archangelo Padreca Fernandes <sup>1,†</sup>, Débora da Silva <sup>1,†</sup>, Ludimila Souza Santos <sup>2</sup>, Thamires Rodrigues de Sousa <sup>2</sup> and Jefferson Russo Victor <sup>1,2,3,\*</sup>

<sup>1</sup> Faculdades Metropolitanas Unidas (FMU), Sao Paulo 04505-002, Brazil;; b.nakamatsu@uol.com.br (B.Y.N.); archangelo.fmu@gmail.com (A.P.F.); desilva@portoseguro.org.br (D.d.S.)

<sup>2</sup> Laboratory of Medical Investigation LIM 56, Division of Dermatology, School of Medicine, University of Sao Paulo (FM-USP), Sao Paulo 05403-000, Brazil, ludisantos3110@gmail.com (L.S.S.); sousar-thamires@gmail.com (T.R.d.S.)

<sup>3</sup> School of Medicine, Universidade Santo Amaro (UNISA), Sao Paulo 04829-300, Brazil;

\* Correspondence: victorjr@usp.br; Tel.: +55-11-30-617-499; Fax: +55-11-30-817-190

† These authors contribute equally.

### Skin prick test (SPT) therapeutic effectiveness evaluation:

**Recruited Volunteers:**  
(After atopic state confirmation and without previous SPT)

Atopic  
or  
Non-atopic

Serum IgE evaluation  
and SPT with in-  
person discussion of  
results  
(Avoiding allergens instructions)

Six months  
interval

Serum IgE evaluation,  
SPT and

**Questionnaire**  
("yes or no" answers):  
i- Have you changed your social  
habits after SPT results?  
ii- Could you avoid the development  
of allergies entirely?  
iii- The result of the SPT collaborated  
with an improvement of your health?

**Results  
presentation  
with in-person  
discussion**

**Figure S1.** An eschamatic illustration of the therapeutic effectiveness evaluation of SPT used in our study.

**Table S1.** Characteristics of the allergen extracts used in SPT.

| Extract name.  | Allergens origin                                                                                                          |
|----------------|---------------------------------------------------------------------------------------------------------------------------|
| HDM            | <i>Dermatophagoides farinae</i> and <i>Dermatophagoides Pteronyssinus</i>                                                 |
| Fungi          | <i>Aspergillus fulmigatus</i> , <i>Penicillium notatum</i> , <i>Alternaria Alternata</i> and <i>Cladosporium herbarum</i> |
| Cockroach      | <i>Blatella germânica</i> and <i>Periplaneta americana</i>                                                                |
| Grass          | Alder, Birch, Hazel and Cultivated rye                                                                                    |
| Dog epithelium | <i>Canis Familiaris</i>                                                                                                   |
| Cat epithelium | <i>Felis domesticus</i>                                                                                                   |
| Feather        | Chicken and Canary bird                                                                                                   |

**Table S2.** Characteristics of the allergen extracts used in multiplex immunoblot assay (EURO-LINE).

| Allergen type     | Allergens tested                                                                                                          |
|-------------------|---------------------------------------------------------------------------------------------------------------------------|
| <b>HDM</b>        | <i>Dermatophagoide farinae</i> , <i>Dermatophagoides Pteronyssinus</i>                                                    |
| <b>Fungi</b>      | <i>Aspergillus fulmigatus</i> , <i>Penicillium notatum</i> , <i>Alternaria Alternata</i> and <i>Cladosporium herbarum</i> |
| <b>Epithelium</b> | Cat, dog, Horse, Guinea pig, rabbit, hamster                                                                              |
| <b>Grass</b>      | Timothy Grass, Cultivated rye, Alder, Birch, Hazel, Mugwort, English plantain                                             |

**Table S3.** Comparative SPT results obtained before and six months after in-person discussion about allergen avoidance. The results are illustrated as the percentual of reactive individuals to each extract.

| Extract.               | Before (%) | After (%) |
|------------------------|------------|-----------|
| <b>Huse dust mite</b>  | 92.4       | 75.5      |
| <b>Fungi</b>           | 60.6       | 46.2      |
| <b>Grass</b>           | 45.4       | 31.8      |
| <b>Cat</b>             | 43.1       | 25.7      |
| <b>Dog</b>             | 42.4       | 23.4      |
| <b>Cockroaches</b>     | 21.9       | 15.9      |
| <b>Chicken feather</b> | 11.3       | 9.0       |
